# Supplementary material for: Testing Two Evolutionary Theories of Human Aging with DNA Methylation Data
Source: Oxford University Press journal article supplement (doi:10.1534/genetics.117.300217), 2017-08-30
Supplement: files1.pdf [file files1.pdf]

## SUPPLEMENTARY INFORMATION

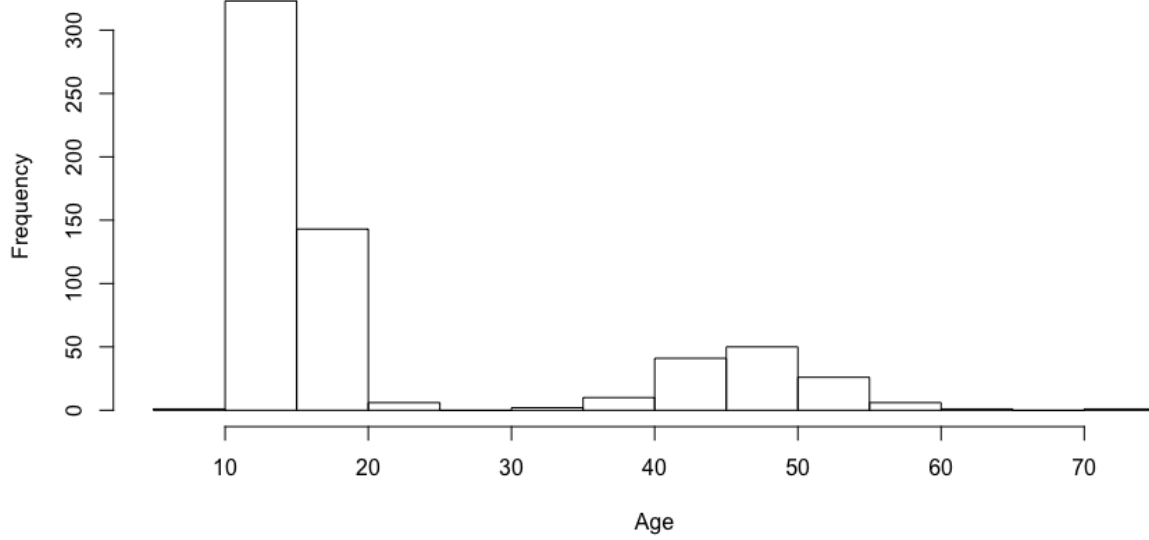

**Figure S1. Age distribution of BSGS subjects with DNA methylation data.**

DNA methylation data was measured in 610 individuals from the Brisbane System Genetics Study. The ages of the individuals range from 10 to 75 years, with a mean age of 21 years.

### Type I Error Rate and Power

To estimate the type I error rate and our power to detect age-dependent changes in genetic and environmental variance, we performed simulations under the null and alternative hypotheses. We first estimated type I error by simulating residualized  $\beta$ -values at 10,000 CpG sites under the null hypothesis, where the genetic and environmental variance are independent of age, or  $\gamma_g$  and  $\gamma_e$  are equal to zero. For each CpG site a residualized  $\beta$ -value,  $X_{it_{sim}}$ , was simulated for each individual  $i$  at age  $t$

$$X_{it_{sim}} = \alpha + \beta_{age}t + \beta_{sex}male + G_i + E_i \quad (S1)$$

where  $G_i$  and  $E_i$  are generated random variables representing genetic and environmental contributions respectively. The environmental contributions  $E_i$  were generated from a normal distribution with mean zero and variance equal to the environmental variance estimated from the BSGS data. The genetic contributions  $G_i$  were generated from a multivariate normal distribution with mean zero and variance equal to  $2\phi_{ij}\sigma_g^2$ , where  $\phi_{ij}$  is the kinship coefficient matrix from the BSGS subjects and  $\sigma_g^2$  is the genetic variance estimated from the BSGS data. This formulation allows our generated genetic residuals to be correlated between relatives as in the original data. For each CpG site, the remaining coefficients in this model,  $\alpha$ ,  $\beta_{age}$ , and  $\beta_{sex}$ , take on values estimated from the BSGS data using equation (1).

At each CpG site, the generated vector  $X_{it_{sim}}$  was used as the phenotype to estimate  $\gamma_g$  and  $\gamma_e$  via equation (2). At a significance level of  $\alpha = 0.05$ , 5.94% of the CpG sites had a  $\gamma_g$

significantly different from 0, and 5.82% of CpG sites had a  $\gamma_e$  significantly different from 0 (Table S1). Figure S2 compares the distributions of  $\gamma_g$  and  $\gamma_e$  P-values, and shows nearly identical distributions at all reasonable levels of significance. These results suggest that our modeling approach has appropriate levels of type I error.

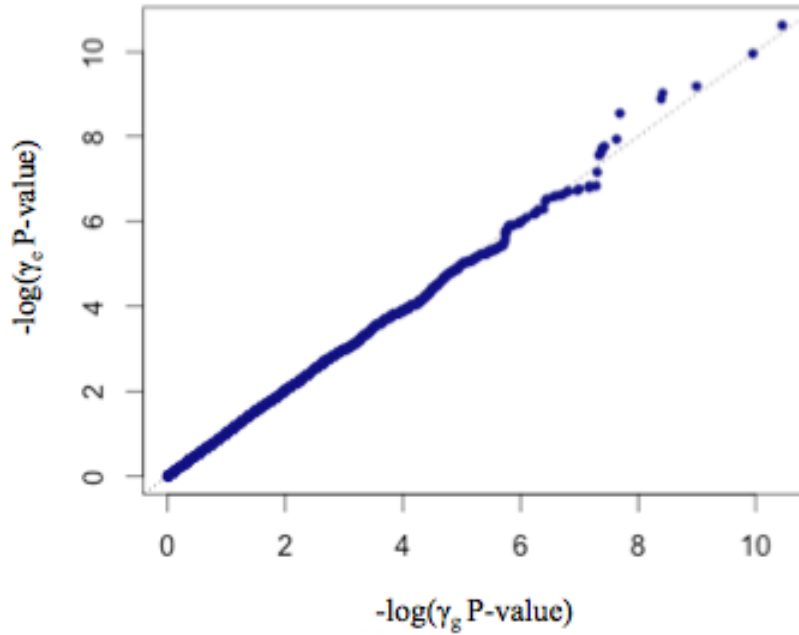

**Figure S2. A quantile-quantile (Q-Q) plot for type I error simulations of  $\gamma_g$  and  $\gamma_e$ .** This plot compares the distribution of  $\gamma_g$  p-values to the distribution of  $\gamma_e$  p-values. Identical distributions will lie along the identity line, shown here as a dashed line.

To estimate power we simulated normalized  $\beta$ -values at 10,000 CpG sites under the alternative hypothesis that the genetic and environmental variances are age-dependent, and  $\gamma_g$  and  $\gamma_e$  are non-zero. To generate these effects, we modified  $G_i$  and  $E_i$  in equation (S1) to include age-dependent terms according to the model in equation (2). The scale of the age dependence for our simulations was set to the mean of the absolute values of  $\gamma_g$  and  $\gamma_e$  estimated from the BSGS data, such that it took the same value for simulation of both  $G_i$  and  $E_i$ .

The modified  $G_i$  and  $E_i$  with age-dependent effects were used to generate new vectors of  $X_{it_{sim}}$  as defined in equation (S1). As before, the generated vector  $X_{it_{sim}}$  was used as the phenotype to calculate  $\gamma_g$  and  $\gamma_e$  via equation (2) for each CpG site. At a significance level of  $\alpha = 0.05$ , 44.9% of the CpG sites had a  $\gamma_g$  that was significantly different from 0, and 51.2% of the CpG sites had a  $\gamma_e$  that was significantly different from 0 (Table S1). Figure S3 compares the distributions of  $\gamma_g$  and  $\gamma_e$  P-values, and shows nearly identical distributions at reasonable levels of significance. This confirms that we have approximately equivalent power to detect age-dependent changes in the genetic and environmental variances with  $\gamma_g$  and  $\gamma_e$ .

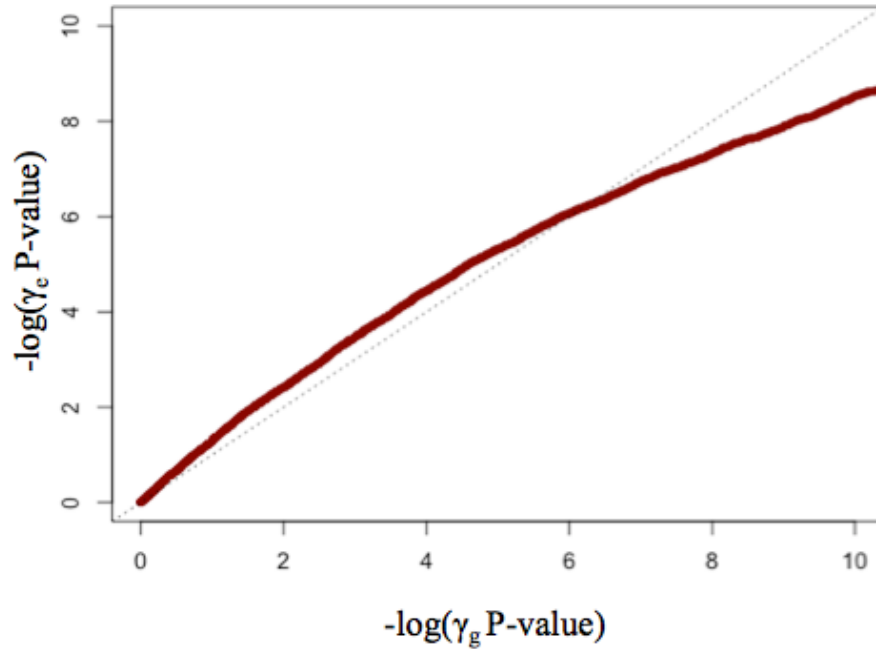

**Figure S3. A quantile-quantile (Q-Q) plot for power simulations of  $\gamma_g$  and  $\gamma_e$ .** This plot compares the distribution of  $\gamma_g$  p-values to the distribution of  $\gamma_e$  p-values. Identical distributions will lie along the identity line, shown here as a dashed line.

**Table S1. Type I error rate and power for age-dependent changes in genetic and environmental variance.**

|                                      | TYPE I ERROR<br>$\gamma_g = 0, \gamma_e = 0$ | POWER<br>$\gamma_g \neq 0, \gamma_e \neq 0$ |
|--------------------------------------|----------------------------------------------|---------------------------------------------|
| Proportion of significant $\gamma_g$ | 0.0594                                       | 0.4492                                      |
| Proportion of significant $\gamma_e$ | 0.0582                                       | 0.5119                                      |

The age-dependence of genetic variance is reflected by  $\gamma_g$ .

The age-dependence of environmental variance is reflected by  $\gamma_e$ .

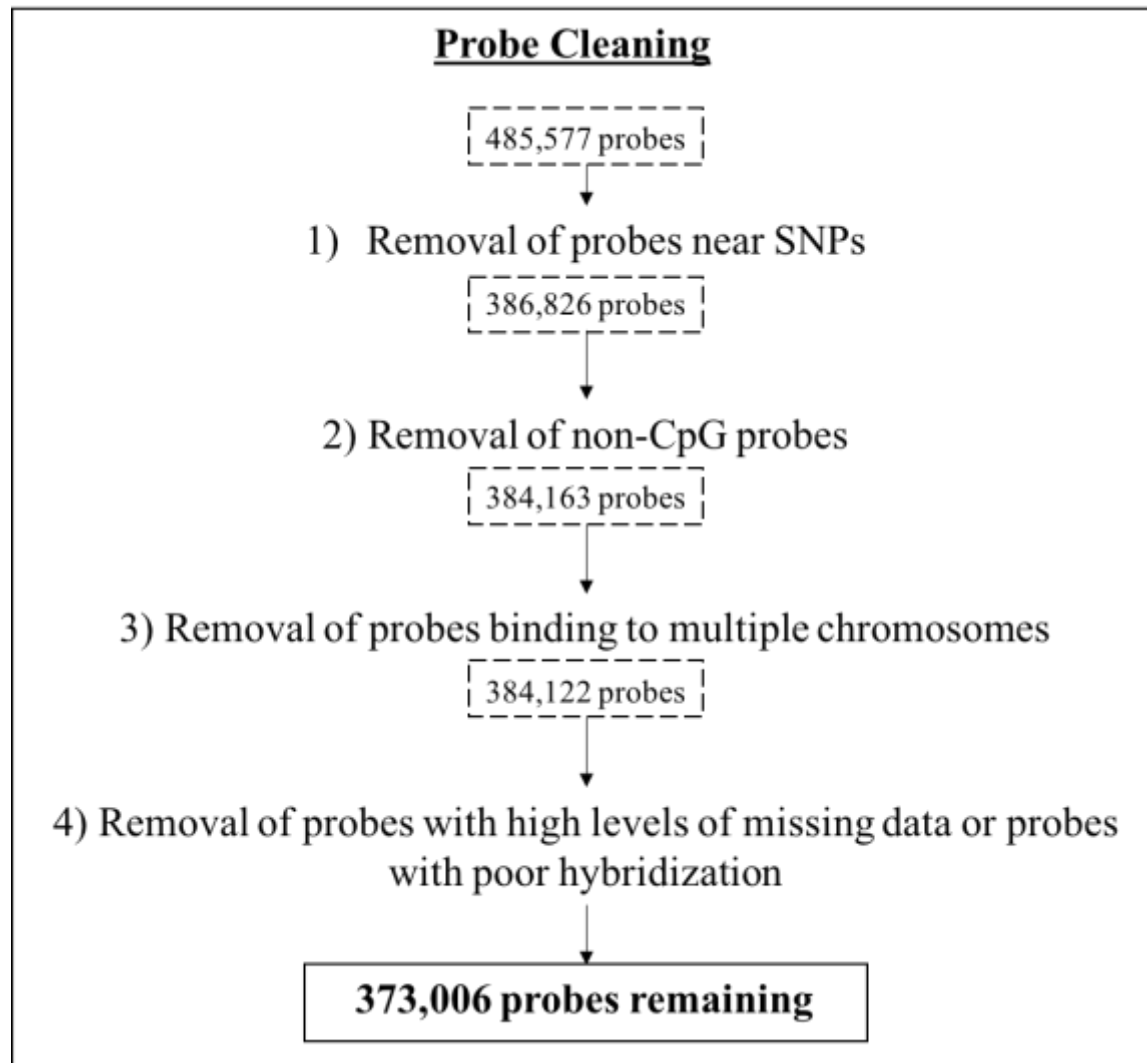

Figure S4. Data cleaning process for BSGS DNA methylation data.

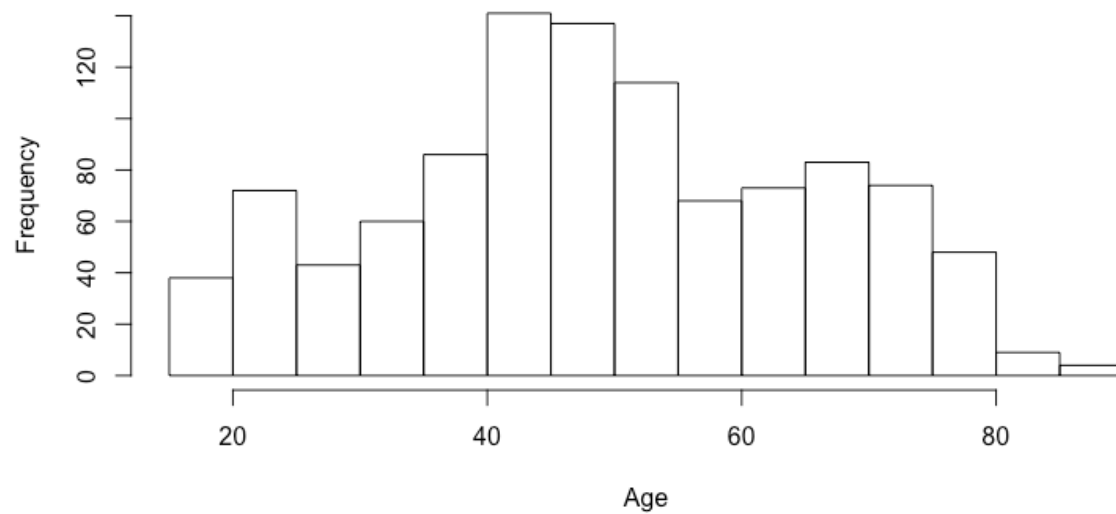

**Figure S5. Age distribution of GOLDN subjects with DNA methylation data.**

DNA methylation data was measured in 1050 individuals from the GOLDN Study. The ages of the individuals range from 18 to 88 years, with a mean age of 49 years.

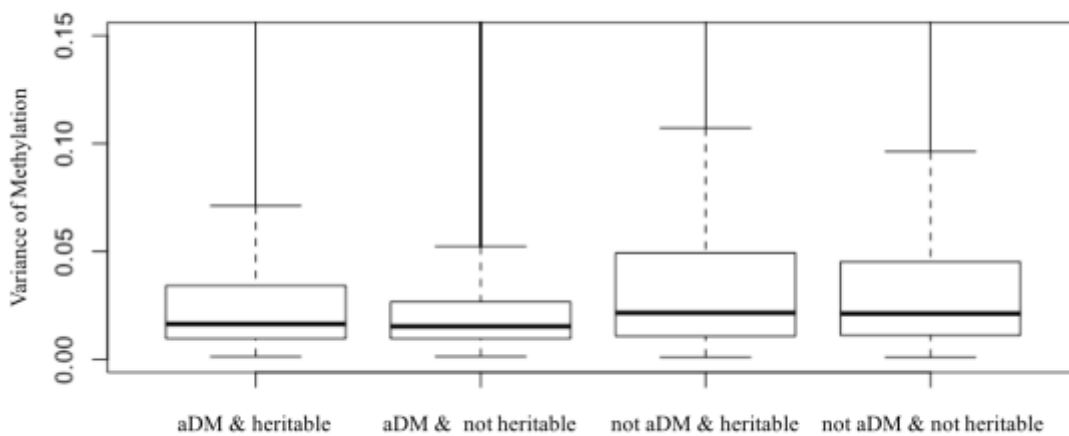

**Figure S6. Boxplots comparing the distribution of methylation variance at CpG sites categorized by aDM and heritability status.**

**Table S2. Gene Ontology Terms.** Total counts and the significant terms for MA and DS after multiple test correction (FDR<0.05).

| ONTOLOGY                | MA                                                                                                            |                  | DS                                                                      |                  |
|-------------------------|---------------------------------------------------------------------------------------------------------------|------------------|-------------------------------------------------------------------------|------------------|
|                         | COUNT                                                                                                         |                  | COUNT                                                                   |                  |
|                         | TERM                                                                                                          | ADJUSTED P-VALUE | TERM                                                                    | ADJUSTED P-VALUE |
| MOLECULAR<br>FUNCTION   | <b>3</b>                                                                                                      |                  | <b>2</b>                                                                |                  |
|                         | Sequence-specific DNA binding                                                                                 | 5.88E-7          | Sequence-specific DNA binding                                           | 2.23E-8          |
|                         | Double-stranded DNA binding                                                                                   | 9.90E-4          | Double-stranded DNA binding                                             | 2.39E-2          |
|                         | Transcriptional activator activity, RNA polymerase II core promoter proximal region sequence-specific binding | 9.98E-3          |                                                                         |                  |
| CELLULAR<br>COMPONENT   | <b>2</b>                                                                                                      |                  | <b>0</b>                                                                |                  |
|                         | Integral component of plasma membrane                                                                         | 2.07E-4          |                                                                         |                  |
|                         | Cell junction                                                                                                 | 1.80E-2          |                                                                         |                  |
| BIOLOGICAL<br>PROCESSES | <b>19</b>                                                                                                     |                  | <b>5</b>                                                                |                  |
|                         | Positive regulation of nucleobase-containing compound metabolic process                                       | 4.52E-5          | Positive regulation of nucleobase-containing compound metabolic process | 9.07E-4          |
|                         | Cardiovascular system development                                                                             | 4.52E-5          | Positive regulation of transcription from RNA polymerase II promoter    | 9.07E-4          |
|                         | Positive regulation of RNA biosynthetic process                                                               | 8.44E-5          | Negative regulation of transcription from RNA polymerase II promoter    | 9.07E-4          |
|                         | Sensory organ morphogenesis                                                                                   | 2.04E-3          | Positive regulation of RNA biosynthetic process                         | 6.01E-3          |
|                         | Multicellular organism development                                                                            | 2.04E-3          | Pattern specification process                                           | 6.01E-3          |
|                         | Tissue development                                                                                            | 3.24E-3          |                                                                         |                  |
|                         | Positive regulation of transcription from RNA polymerase II promoter                                          | 3.57E-3          |                                                                         |                  |
|                         | Inner ear morphogenesis                                                                                       | 1.13E-2          |                                                                         |                  |
|                         | Embryo development ending in birth or egg hatching                                                            | 1.13E-2          |                                                                         |                  |
|                         | Localization                                                                                                  | 1.22E-2          |                                                                         |                  |
|                         | Negative regulation of transcription from RNA polymerase II promoter                                          | 1.56E-2          |                                                                         |                  |
|                         | Negative regulation of multicellular organismal process                                                       | 1.56E-2          |                                                                         |                  |
|                         | Embryonic forelimb morphogenesis                                                                              | 1.64E-2          |                                                                         |                  |

|     |                                               |         |          |
|-----|-----------------------------------------------|---------|----------|
|     | Morphogenesis of a branching structure        | 1.84E-2 |          |
|     | Positive regulation of neuron differentiation | 3.34E-2 |          |
|     | Regulation of cellular component movement     | 4.37E-2 |          |
| ALL | <b>24</b>                                     |         | <b>7</b> |

**Table S3. Expression analysis of replicated MA sites with significant  $\gamma_g$ .** Significant expression and methylation associations after multiple test correction (FDR < 0.05).

| CPG SITE<br>LOCATION                  | ASSOCIATED<br>EXPRESSION<br>PROBE | DIRECTION OF<br>ASSOCIATION | P-VALUE               | GENE      | LOCATION OF<br>TSS |
|---------------------------------------|-----------------------------------|-----------------------------|-----------------------|-----------|--------------------|
| <b>cg02914422</b><br>Chr 7: 32110145  | ILMN_1778788                      | Negative                    | 1.03x10 <sup>-5</sup> | AMOTL2    | Chr 3: 134094259   |
|                                       | ILMN_3272768                      | Negative                    | 4.63x10 <sup>-6</sup> | LINC00339 | Chr 1: 22351683    |
|                                       | ILMN_2397199                      | Negative                    | 9.67x10 <sup>-6</sup> | NDEL1     | Chr 17: 8339169    |
|                                       | ILMN_1786734                      | Negative                    | 1.06x10 <sup>-5</sup> | EIF5      | Chr 14: 103800338  |
| <b>cg05691152</b><br>Chr 22: 38092978 | ILMN_1684585                      | Negative                    | 6.07x10 <sup>-6</sup> | ACSL1     | Chr 4: 185747268   |
|                                       | ILMN_1694548                      | Negative                    | 8,40x10 <sup>-6</sup> | ANXA3     | Chr 4: 79472741    |
|                                       | ILMN_1715068                      | Negative                    | 1.13x10 <sup>-5</sup> | AQP9      | Chr 15: 58430407   |
|                                       | ILMN_1694243                      | Negative                    | 1.53x10 <sup>-6</sup> | LILRA6    | Chr 19: 54746617   |
|                                       | ILMN_1714643                      | Negative                    | 4,87x10 <sup>-6</sup> | MGAM      | Ch 7: 141695678    |
|                                       | ILMN_2114720                      | Negative                    | 2.90x10 <sup>-6</sup> | SLPI      | Chr 20: 43880879   |
| <b>cg13672736</b><br>Chr 9: 136114066 | ILMN_1678535                      | Positive                    | 7.37x10 <sup>-6</sup> | ESR1      | Chr 6: 152011630   |
